# Supplementary material for: Au-nanoparticles-decorated Sb2S3 nanowire-based flexible ultraviolet/visible photodetectors
Source: Royal Society of Chemistry journal article supplement (doi:10.1039/c7tc00696a), 2017-01-01
Supplement: c7tc00696a1.pdf [file c7tc00696a1.pdf]

# Au-nanoparticles-decorated $\text{Sb}_2\text{S}_3$ nanowire based flexible ultraviolet/visible photodetectors

Kai Zhang,<sup>a</sup> Tao Luo,<sup>a</sup> Haoran Chen,<sup>a</sup> Zheng Lou,<sup>\*a</sup> and Guozhen Shen<sup>\*a,b</sup>

<sup>a</sup>State Key Laboratory for Superlattices and Microstructures, Institute of Semiconductors, Chinese Academy of Sciences, Beijing 100083, China

<sup>b</sup>College of Materials Science and Opto-Electronic Technology, University of Chinese Academy of Sciences, Beijing 100049, China

\*gzshen@semi.ac.cn; zlou@semi.ac.cn

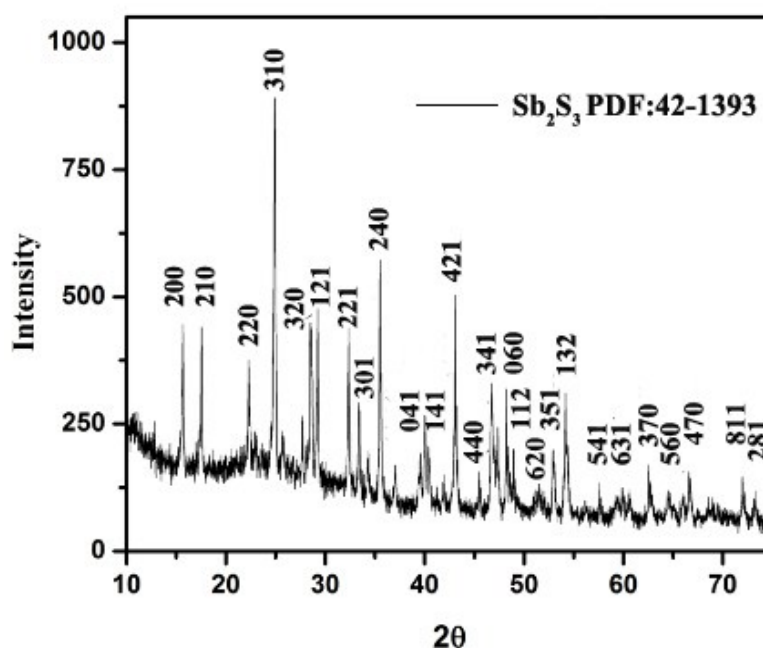

Figure S1. XRD pattern of the CVD-grown  $\text{Sb}_2\text{S}_3$  NWs.

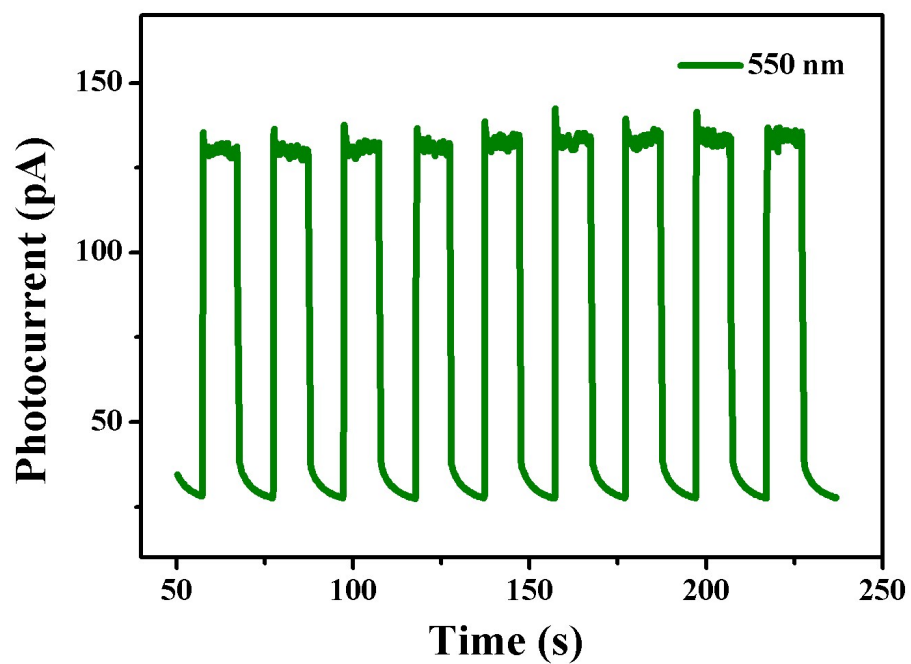

**Figure S2.** On/off cycle transient photoresponse of the flexible hybrid device, under 550nm light with a power density of  $141 \mu\text{W cm}^{-2}$  at a bias of 10V.

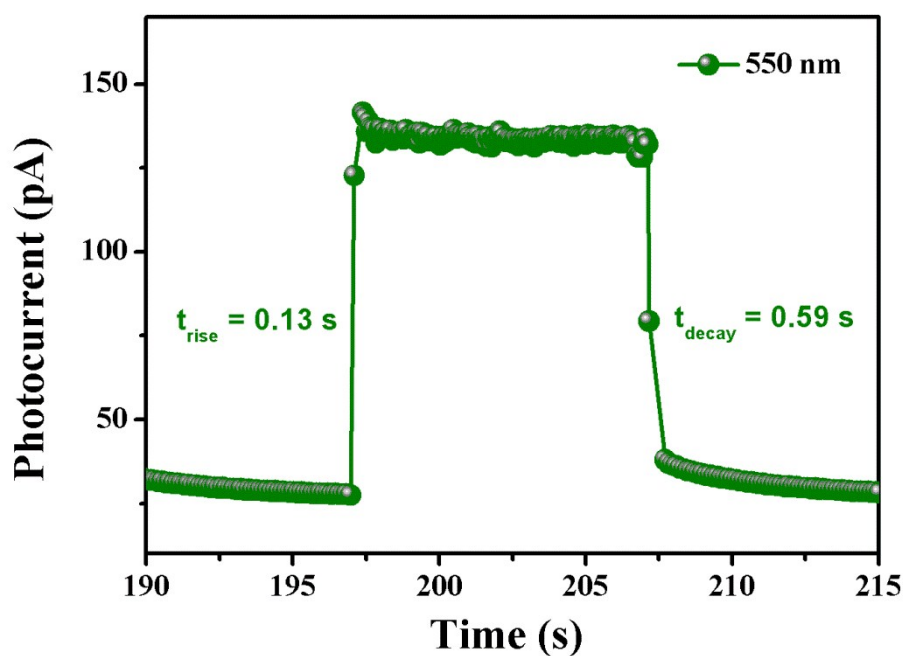

**Figure S3.** Response and recovery time of the hybrid device.
